# Supplementary material for: ZnSe nanoribbon/Si nanowire p–n heterojunction arrays and their photovoltaic application with graphene transparent electrodes
Source: Royal Society of Chemistry journal article supplement (doi:10.1039/c2jm34720b), 2012-01-01
Supplement: c2jm34720b.pdf [file c2jm34720b.pdf]

## Supporting Information

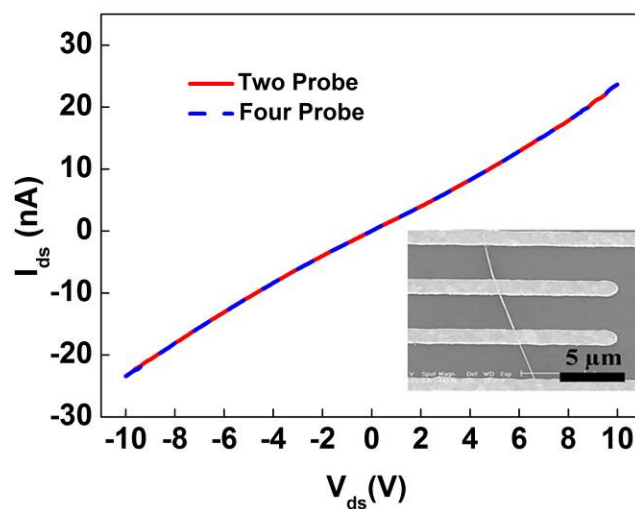

**Fig. S1**  $I$ - $V$  curves of a single p-ZnSeNW measured by two-probe and four-probe methods, respectively, with Cu/Au (4 nm/50 nm) electrodes. Inset shows the SEM image of the device for four-probe measurement.

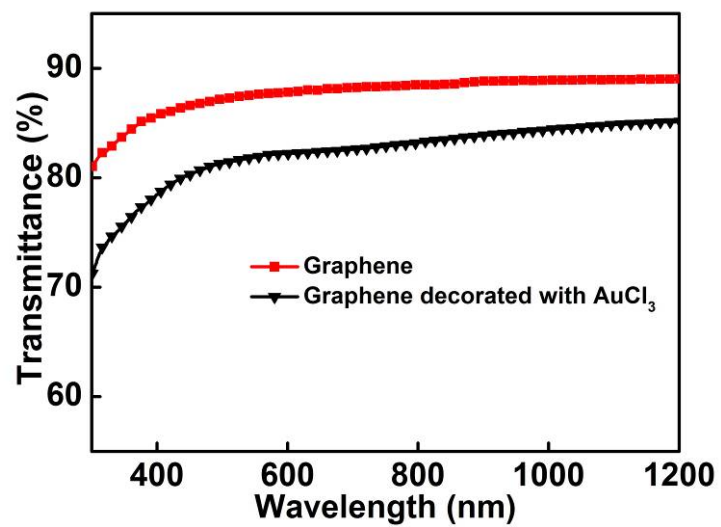

**Fig.S2** Transmittance spectra of the multi-layer graphene film measured before and after AuCl<sub>3</sub> (10 mM) modification.

**Table S1.** Device characteristics of the ZnSeNR/SiNW p-n heterojunction arrays with different device structure under simulated AM 1.5G solar irradiation at  $100 \text{ mWcm}^{-2}$ . Three devices for each structure were measured. It is clear that the devices exhibit good stability and reproducibility.

| Nano-heterojunction structures                                                | Sample | $J_{sc}$ ( $\text{mA/cm}^2$ ) | $V_{oc}$ (V) | $FF$ (%) | $\eta$ (%) |
|-------------------------------------------------------------------------------|--------|-------------------------------|--------------|----------|------------|
| ZnSeNR/SiNW p-n heterojunction array with graphene/ $\text{AuCl}_3$ electrode | A1     | 7.9                           | 0.4          | 22.3     | 0.71       |
|                                                                               | A2     | 8.1                           | 0.41         | 22.9     | 0.76       |
|                                                                               | A3     | 8.3                           | 0.4          | 23.4     | 0.78       |
| ZnSeNR/SiNW p-n heterojunction array with Cu/Au electrode                     | B1     | 4.7                           | 0.28         | 39.0     | 0.51       |
|                                                                               | B2     | 5.1                           | 0.28         | 39.6     | 0.56       |
|                                                                               | B3     | 5.5                           | 0.28         | 40.1     | 0.61       |
| Drop-casted p-ZnSeNRs/ $\text{CH}_3$ -SiNW array with Cu/Au electrode         | C1     | 11.5                          | 0.35         | 42.3     | 1.71       |
|                                                                               | C2     | 13.9                          | 0.35         | 46.8     | 2.27       |
|                                                                               | C3     | 14.1                          | 0.35         | 44.1     | 2.17       |
